# Supplementary material for: “TiC-TUG”: technology in clinical practice using the instrumented timed up and go test—a scoping review
Source: PubMed Central journal article supplement (PMC11055724; doi:10.1007/s40520-024-02733-7), 2024-04-27
Supplement: 40520_2024_2733_MOESM2_ESM.pdf [file 40520_2024_2733_MOESM2_ESM.pdf]

## Supplement 2: Inclusion and exclusion criteria

| <b>Criterion</b>      | <b>Include</b>                                                                                                                                             | <b>Exclude</b>                                                                                                                                                                                                                             |
|-----------------------|------------------------------------------------------------------------------------------------------------------------------------------------------------|--------------------------------------------------------------------------------------------------------------------------------------------------------------------------------------------------------------------------------------------|
| Publication year      | 2012-2022                                                                                                                                                  | Studies published before 2012                                                                                                                                                                                                              |
| Publication type      | Peer-reviewed articles, full-text available                                                                                                                | Posters, short communications, conference papers, dissertations, reviews                                                                                                                                                                   |
| Sample size           | $N \geq 20$ available for analysis                                                                                                                         | $N < 20$ available for analysis                                                                                                                                                                                                            |
| Mean age              | Mean age $\geq 60$ years                                                                                                                                   | Mean age $< 60$ years                                                                                                                                                                                                                      |
| Population            | Healthy older adults, common age-associated diseases (e.g., Parkinson, Arthrosis)                                                                          | Early acquired or congenital diseases, typically not associated with aging (e.g., MS); orphan diseases: less than five in 10,000 persons in Europe, as defined by the European Regulation on orphan medicinal products, (e.g., Huntington) |
| Study design          | Prospective studies, at least 2 measurement time points (e.g., follow up, post-surgery, Parkinson on/off state)                                            | Cross-sectional studies                                                                                                                                                                                                                    |
| Study aim             | Studies using iTUG to measure pre-post changes following interventions with older adults (e.g., medication, training, surgery, tap-test, assistive device) | Studies using the iTUG to predict clinical outcomes                                                                                                                                                                                        |
| Type of data          | Primary and secondary analyses                                                                                                                             |                                                                                                                                                                                                                                            |
| iTUG walking distance | 3 meters                                                                                                                                                   | Other distances, modified walking distances (e.g., door passage, turning in front of wall)                                                                                                                                                 |
| iTUG technology       | Technology body-worn during TUG (e.g., wearable sensors, smartphone)                                                                                       | Video-based measurement, instrumented walkway, laser                                                                                                                                                                                       |
| iTUG procedure        | Technology measures during the test                                                                                                                        | Stopwatch measurement with subsequent data entry                                                                                                                                                                                           |
| Reported data         | Minimum requirement: reported duration of total iTUG or iTUG segments (e.g., turning, sit-to-stand)                                                        | No iTUG total/segment duration data reported                                                                                                                                                                                               |
