# Supplementary material for: “TiC-TUG”: technology in clinical practice using the instrumented timed up and go test—a scoping review
Source: PubMed Central journal article supplement (PMC11055724; doi:10.1007/s40520-024-02733-7), 2024-04-27
Supplement: 40520_2024_2733_MOESM3_ESM.pdf [file 40520_2024_2733_MOESM3_ESM.pdf]

### Supplement 3: Search string for PubMed/MEDLINE

PubMed: [tiab], [ti], [tw], [mh], [mh:noexp], [sh]

Ovid: Exp "..."/, (... OR ...).ti,ab,kf., (...) ADJ3 (...)

|                                                                                                                                                                                                                                                                                                                                                                                                                                                                                                                                                                                                                                                                                                     |                                                                                                                                                                                       |
|-----------------------------------------------------------------------------------------------------------------------------------------------------------------------------------------------------------------------------------------------------------------------------------------------------------------------------------------------------------------------------------------------------------------------------------------------------------------------------------------------------------------------------------------------------------------------------------------------------------------------------------------------------------------------------------------------------|---------------------------------------------------------------------------------------------------------------------------------------------------------------------------------------|
| <p>(<br/>TUG[tiab] OR<br/>iTUG[tiab] OR<br/>"Timed Up and Go"[tiab] OR<br/>"Timed Up Go"[tiab]<br/>)<br/>AND</p>                                                                                                                                                                                                                                                                                                                                                                                                                                                                                                                                                                                    | <p>A1</p>                                                                                                                                                                             |
| <p>(<br/>Acceleromet*[tw] OR<br/>instrumented[tiab] OR<br/>sensor*[tiab] OR<br/>"inertial measurement unit"[tiab] OR<br/>IMU[tiab] OR<br/>Gyroscope*[tiab] OR<br/>Magnetometer*[tiab] OR<br/>"mobile sensing"[tiab] OR<br/><br/>"Wearable Electronic Devices"[Mesh:noexp] OR<br/>device*[tiab] OR<br/>electronic*[tiab] OR<br/><br/>"Cell Phone"*[tw] OR<br/>Smartphone*[tw] OR<br/>"Smart phone"[tiab] OR<br/>"Mobile device"[tiab] OR<br/>"Mobile phone"[tiab] OR<br/>Tablet*[tiab] OR<br/><br/>"Mobile App"*[tw] OR<br/>app-based[tiab] OR<br/><br/>"mobile health"[tiab] OR<br/>mHealth[tiab] OR<br/>ehealth[tiab] OR<br/>software[tiab] OR<br/>digital[tiab] OR<br/>technolog*[tiab]<br/>)</p> | <p>A2</p> <p>Technology[Mesh]?<br/>Electronics[Mesh]?</p> <p>"Wearable Electronic Devices" &gt;<br/>Fitness Trackers, Hearing Aids,<br/>Smart Glasses</p> <p>[tw] inkl. Meshterms</p> |
| <p>AND<br/>(<br/>2012:2022[dp]<br/>)</p>                                                                                                                                                                                                                                                                                                                                                                                                                                                                                                                                                                                                                                                            | <p>Filter</p> <p>Ab 2012</p>                                                                                                                                                          |
| <p>NOT<br/>(<br/>(infant[mh] OR child[mh] OR adolescent[mh] OR "Young Adult"[mh]) NOT (aged[mh] OR "Middle Aged"[mh])<br/>)</p>                                                                                                                                                                                                                                                                                                                                                                                                                                                                                                                                                                     | <p>Filter</p> <p>Erwachsene &gt; 60</p> <p>(rund 40 Treffer weniger)</p>                                                                                                              |
