# Supplementary material for: “TiC-TUG”: technology in clinical practice using the instrumented timed up and go test—a scoping review
Source: PubMed Central journal article supplement (PMC11055724; doi:10.1007/s40520-024-02733-7), 2024-04-27
Supplement: 40520_2024_2733_MOESM4_ESM.pdf [file 40520_2024_2733_MOESM4_ESM.pdf]

## Supplement 4: Quality Assessment Tool for Before-After (Pre-Post) Studies with No Control Group

| First author (Year)                                                                                       | 1. objective clearly stated | 2. eligibility criteria clearly described | 3. participants representative of population | 4. all eligible participants enrolled | 5. sample size sufficiently large | 6. intervention clearly described | 7. outcome measures clearly defined | 8. assessors blinded to participants' interventions | 9. loss to follow up 20% or less | 10. statistical examination of pre-post changes | 11. $\geq 2$ iTUG repetitions per assessment timepoint | 12. multi-level structure |
|-----------------------------------------------------------------------------------------------------------|-----------------------------|-------------------------------------------|----------------------------------------------|---------------------------------------|-----------------------------------|-----------------------------------|-------------------------------------|-----------------------------------------------------|----------------------------------|-------------------------------------------------|--------------------------------------------------------|---------------------------|
| <b>Patients with idiopathic normal pressure hydrocephalus (PwINPH) – surgical and invasive procedures</b> |                             |                                           |                                              |                                       |                                   |                                   |                                     |                                                     |                                  |                                                 |                                                        |                           |
| Ferrari (2020)                                                                                            | yes                         | yes                                       | yes                                          | yes                                   | NR                                | yes                               | no                                  | NR                                                  | NR                               | no                                              | yes                                                    | NA                        |
| Ferrari (2022)                                                                                            | yes                         | yes                                       | yes                                          | yes                                   | yes                               | yes                               | no                                  | NR                                                  | yes                              | yes*                                            | yes                                                    | NA                        |
| Yamada (2019)                                                                                             | yes                         | yes                                       | yes                                          | yes                                   | NR                                | yes                               | yes                                 | NR                                                  | yes                              | no                                              | yes                                                    | NA                        |
| Ishikawa (2019)                                                                                           | yes                         | no                                        | yes                                          | no                                    | NR                                | yes                               | yes                                 | NR                                                  | yes                              | yes                                             | yes                                                    | NA                        |
| <b>Patients with Parkinson's disease (PwPD) - pharmacological intervention</b>                            |                             |                                           |                                              |                                       |                                   |                                   |                                     |                                                     |                                  |                                                 |                                                        |                           |
| Dibilio (2017)                                                                                            | yes                         | yes                                       | yes                                          | NR                                    | NR                                | yes                               | no                                  | NR                                                  | yes                              | yes                                             | yes                                                    | NA                        |
| Miller Koop (2018)                                                                                        | yes                         | yes                                       | yes                                          | NR                                    | NR                                | yes                               | no                                  | yes                                                 | NR                               | yes                                             | yes                                                    | NA                        |
| <b>Orthopedic conditions – elective surgery</b>                                                           |                             |                                           |                                              |                                       |                                   |                                   |                                     |                                                     |                                  |                                                 |                                                        |                           |
| Bloomfield (2019)                                                                                         | yes                         | yes                                       | yes                                          | NR                                    | NR                                | yes                               | no                                  | NR                                                  | no                               | yes                                             | yes                                                    | NA                        |
| Perelgut (2020)                                                                                           | yes                         | yes                                       | yes                                          | NR                                    | yes                               | yes                               | no                                  | NR                                                  | yes                              | yes                                             | yes                                                    | NA                        |
| <b>Exercise and rehabilitation interventions in different settings and populations</b>                    |                             |                                           |                                              |                                       |                                   |                                   |                                     |                                                     |                                  |                                                 |                                                        |                           |
| <b>Patients with Parkinson's disease (PwPD)</b>                                                           |                             |                                           |                                              |                                       |                                   |                                   |                                     |                                                     |                                  |                                                 |                                                        |                           |
| Flood (2020)                                                                                              | yes                         | yes                                       | yes                                          | NR                                    | NR                                | yes                               | no                                  | NR                                                  | NR                               | yes                                             | yes                                                    | NA                        |
| Mollinedo-Cardalda (2018)                                                                                 | yes                         | yes                                       | yes                                          | yes                                   | yes                               | yes                               | no                                  | no                                                  | yes                              | yes                                             | NR                                                     | NA                        |
| Picardi (2020)                                                                                            | yes                         | yes                                       | yes                                          | NR                                    | NR                                | no                                | yes                                 | NR                                                  | NR                               | yes                                             | yes                                                    | NA                        |
| <b>Participants recruited in outpatient settings</b>                                                      |                             |                                           |                                              |                                       |                                   |                                   |                                     |                                                     |                                  |                                                 |                                                        |                           |
| Smith (2021)                                                                                              | yes                         | yes                                       | yes                                          | NR                                    | yes                               | yes                               | no                                  | NR                                                  | no                               | yes*                                            | NR                                                     | NA                        |

| <b>First author (Year)</b>                                                | 1. objective clearly stated | 2. eligibility criteria clearly described | 3. participants representative of population | 4. all eligible participants enrolled | 5. sample size sufficiently large | 6. intervention clearly described | 7. outcome measures clearly defined | 8. assessors blinded to participants' interventions | 9. loss to follow up 20% or less | 10. statistical examination of pre-post changes | 11. $\geq 2$ iTUG repetitions per assessment timepoint | 12. multi-level structure |
|---------------------------------------------------------------------------|-----------------------------|-------------------------------------------|----------------------------------------------|---------------------------------------|-----------------------------------|-----------------------------------|-------------------------------------|-----------------------------------------------------|----------------------------------|-------------------------------------------------|--------------------------------------------------------|---------------------------|
| Celletti (2020)                                                           | yes                         | yes                                       | yes                                          | NR                                    | NR                                | yes                               | no                                  | NR                                                  | yes                              | yes                                             | NR                                                     | NA                        |
| Doheny (2013)                                                             | yes                         | no                                        | yes                                          | NR                                    | NR                                | yes                               | no                                  | NR                                                  | yes                              | yes                                             | yes                                                    | NA                        |
| Williams (2021)                                                           | yes                         | yes                                       | yes                                          | yes                                   | no                                | yes                               | no                                  | yes                                                 | no                               | yes                                             | no                                                     | NA                        |
| <b>Participants recruited in inpatient and institutionalized settings</b> |                             |                                           |                                              |                                       |                                   |                                   |                                     |                                                     |                                  |                                                 |                                                        |                           |
| Caronni (2019)                                                            | yes                         | yes                                       | yes                                          | NR                                    | NR                                | yes                               | yes                                 | NR                                                  | yes                              | yes                                             | yes                                                    | NA                        |
| Cancela Carral (2017)                                                     | yes                         | yes                                       | yes                                          | NR                                    | NR                                | yes                               | no                                  | no                                                  | no                               | yes                                             | NR                                                     | NA                        |
| Cancela Carral (2019)                                                     | yes                         | yes                                       | yes                                          | NR                                    | no                                | yes                               | no                                  | NR                                                  | yes                              | yes                                             | NR                                                     | NA                        |
| <b>Assistive devices</b>                                                  |                             |                                           |                                              |                                       |                                   |                                   |                                     |                                                     |                                  |                                                 |                                                        |                           |
| Toosizadeh (2020)                                                         | yes                         | yes                                       | yes                                          | NR                                    | NR                                | yes                               | no                                  | NR                                                  | NR                               | no                                              | yes                                                    | NA                        |
| Yalla (2014)                                                              | yes                         | yes                                       | yes                                          | NR                                    | yes                               | yes                               | no                                  | NR                                                  | NR                               | yes*                                            | NR                                                     | NA                        |

Notes: yes\* = if intention-to-treat analysis was reported

## Items and specific criteria for quality rating

| Items                                                                                                                                                                                                                       | yes                                                                                                                                 | no                                                                                                       |
|-----------------------------------------------------------------------------------------------------------------------------------------------------------------------------------------------------------------------------|-------------------------------------------------------------------------------------------------------------------------------------|----------------------------------------------------------------------------------------------------------|
| 1. Was the study question or objective clearly stated?                                                                                                                                                                      | if study question/objective clearly stated                                                                                          | if study question/objective not clearly stated                                                           |
| 2. Were eligibility/selection criteria for the study population prespecified and clearly described?                                                                                                                         | if criteria prespecified and clearly described                                                                                      | if criteria not prespecified/not sufficiently described                                                  |
| 3. Were the participants in the study representative of those who would be eligible for the test/service/intervention in the general or clinical population of interest?                                                    | yes for all studies, because inclusion criteria were age > 60 years; congenital, non-aged-related, or orphan diseases were excluded |                                                                                                          |
| 4. Were all eligible participants that met the prespecified entry criteria enrolled?                                                                                                                                        | if flowchart or description of enrollment provided                                                                                  | if further in/exclusion criteria were added after recruiting or enrollment with no reason                |
| 5. Was the sample size sufficiently large to provide confidence in the findings?                                                                                                                                            | if sample size calculation reported and sufficient sample size achieved                                                             | if sufficient sample size was not achieved                                                               |
| 6. Was the test/service/intervention clearly described and delivered consistently across the study population?                                                                                                              | if intervention is clearly described                                                                                                | if information on duration, frequency, type of intervention missing                                      |
| 7. Were the outcome measures prespecified, clearly defined, valid, reliable, and assessed consistently across all study participants?                                                                                       | if outcome measures prespecified and clearly described                                                                              | if information on iTUG distance, repetitions, sensors, body placement, instruction missing (see table 2) |
| 8. Were the people assessing the outcomes blinded to the participants' exposures/interventions?                                                                                                                             | if assessors were blinded                                                                                                           | if assessors were not blinded                                                                            |
| 9. Was the loss to follow-up after baseline 20% or less? Were those lost to follow-up accounted for in the analysis?                                                                                                        | yes: if loss to follow-up $\leq$ 20%;<br>yes*: if intention-to-treat analysis was reported                                          | if loss to follow-up >20%                                                                                |
| 10. Did the statistical methods examine changes in outcome measures from before to after the intervention? Were statistical tests done that provided p values for the pre-to-post changes?                                  | yes: if p values reported for pre-post changes;<br>yes*: if confidence intervals are also available for all reported data           | if descriptive statistics only if no p value reported                                                    |
| 11. Were outcome measures of interest taken multiple times before the intervention and multiple times after the intervention (i.e., did they use an interrupted time-series design)?                                        | if > 1 iTUG repetition per measurement timepoint                                                                                    | if only 1 iTUG repetition                                                                                |
| 12. If the intervention was conducted at a group level (e.g., a whole hospital, a community, etc.) did the statistical analysis take into account the use of individual-level data to determine effects at the group level? | NA for all studies, none of the included studies was conducted at a group level                                                     |                                                                                                          |
