# Supplementary material for: “TiC-TUG”: technology in clinical practice using the instrumented timed up and go test—a scoping review
Source: PubMed Central journal article supplement (PMC11055724; doi:10.1007/s40520-024-02733-7), 2024-04-27

## Supplement 5: PRISMA-ScR flow diagram

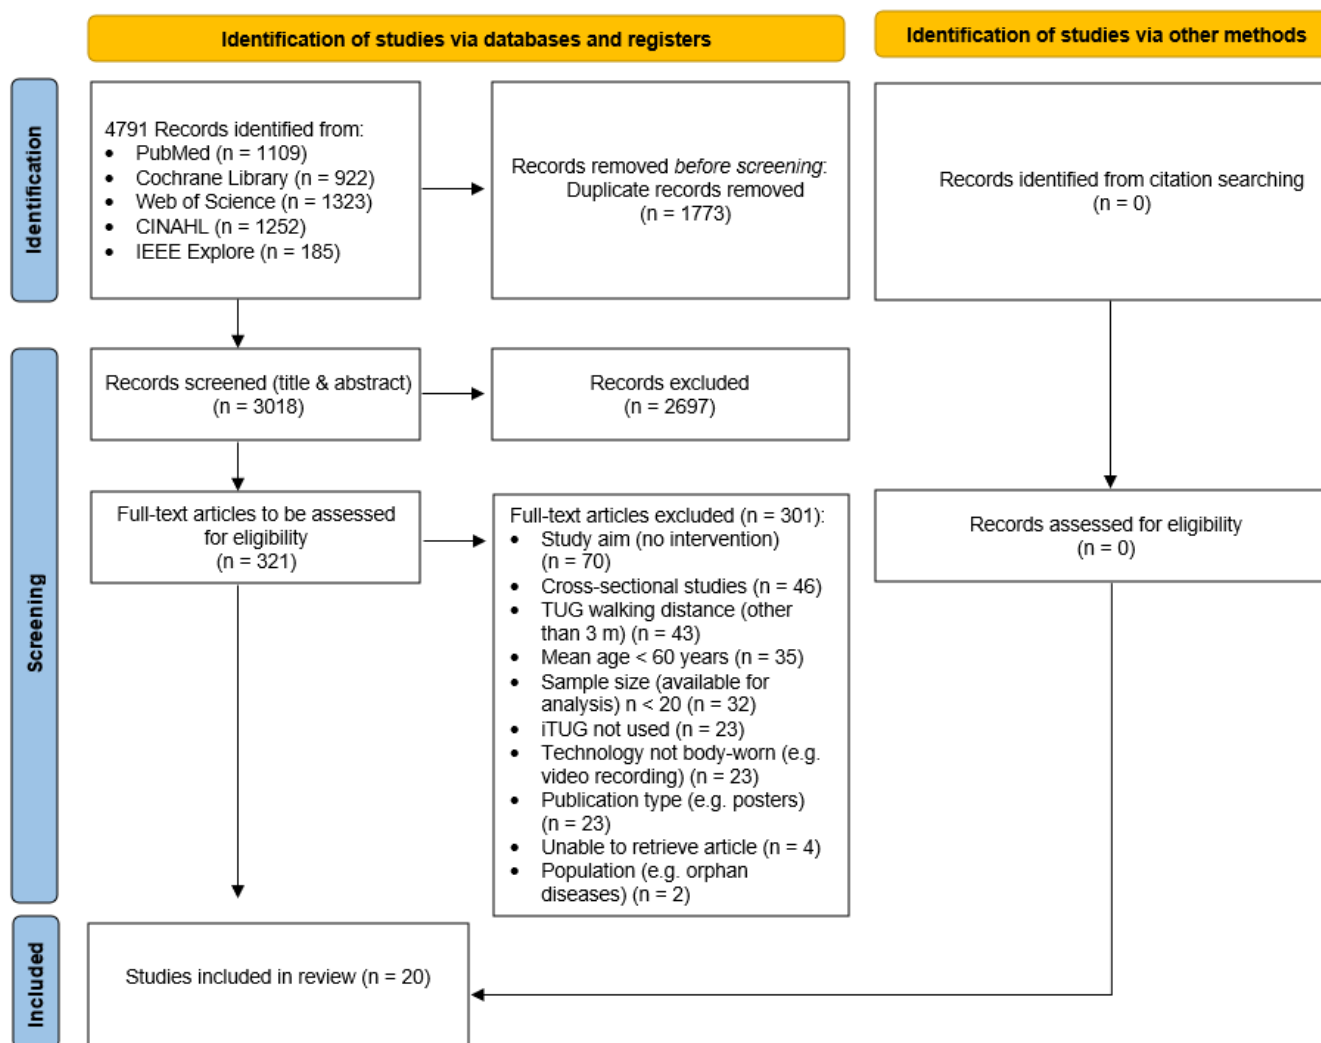

Supplement: 40520_2024_2733_MOESM5_ESM.pdf [file 40520_2024_2733_MOESM5_ESM.pdf]
