# Supplementary material for: “TiC-TUG”: technology in clinical practice using the instrumented timed up and go test—a scoping review
Source: PubMed Central journal article supplement (PMC11055724; doi:10.1007/s40520-024-02733-7), 2024-04-27
Supplement: 40520_2024_2733_MOESM6_ESM.pdf [file 40520_2024_2733_MOESM6_ESM.pdf]

**Supplement 6: Pre-Post differences within groups reported for iTUG total duration and segments including “trends” (non-significant changes)**

|                                                                                                           | Groups            | Pre-post conditions/timepoints                                              | iTUG total | Sit to stand | Walk 1          | Turn 1 | Walk 2 | Turn 2         | Stand to sit | Notes                                                                         |     |
|-----------------------------------------------------------------------------------------------------------|-------------------|-----------------------------------------------------------------------------|------------|--------------|-----------------|--------|--------|----------------|--------------|-------------------------------------------------------------------------------|-----|
| <b>Patients with idiopathic normal pressure hydrocephalus (PwINPH) – surgical and invasive procedures</b> |                   |                                                                             |            |              |                 |        |        |                |              |                                                                               |     |
| Ferrari (2022)                                                                                            | IG                | before tap-test vs. 6 months after ventriculoperitoneal shunt surgery (VPS) | +++        | +++          | total walk: +++ | N/A    |        |                | +++          |                                                                               |     |
| Ishikawa (2019)                                                                                           | IG                | baseline vs. day after tap-test                                             | N/A        | +            | +               | +      | +      | o              | +            | <i>CG: post-intervention data N/A</i>                                         |     |
|                                                                                                           |                   | baseline vs. 1w after VPS                                                   |            | +            | +               | +      | +      | +              |              |                                                                               |     |
|                                                                                                           |                   | tap-test vs. VPS                                                            |            | o            | +               | +      | +      | +              |              |                                                                               |     |
| <b>Patients with Parkinson’s disease (PwPD) - pharmacological intervention</b>                            |                   |                                                                             |            |              |                 |        |        |                |              |                                                                               |     |
| Dibilio (2017)                                                                                            | IG                | off vs. on medication                                                       | +          | +            | +               | +++    | +      | +++            | +            |                                                                               |     |
| Miller Koop (2018)                                                                                        | IG                | off vs. on medication                                                       | +          | +            | total walk: +   | +      | N/A    | turn to sit: - |              |                                                                               |     |
| <b>Orthopedic conditions – elective surgery</b>                                                           |                   |                                                                             |            |              |                 |        |        |                |              |                                                                               |     |
| Bloomfield (2019)                                                                                         | moderate function | baseline vs. 2w after TKR                                                   | -**        | (-)          | (-)             | (-)    | (-)    | N/A            | (-)          | <i>data was extracted from bar chart, no values or significances reported</i> |     |
|                                                                                                           |                   | baseline vs. 6w after TKR                                                   | -          | (o)          | (+)             | (+)    | (-)    |                | (o)          |                                                                               |     |
|                                                                                                           |                   | baseline vs. 12w after TKR                                                  | +          | (-)          | (+)             | (+)    | (+)    |                | (o)          |                                                                               |     |
|                                                                                                           | low function      | baseline vs. 2w after TKR                                                   | -          | (o)          | (-)             | (-)    | (-)    |                | (-)          |                                                                               |     |
|                                                                                                           |                   | baseline vs. 6w after TKR                                                   | +          | (+)          | (+)             | (+)    | (+)    |                | (+)          |                                                                               | (o) |
|                                                                                                           |                   | baseline vs. 12w after TKR                                                  | +++        | (+)          | (+)             | (+)    | (+)    |                | (+)          |                                                                               | (+) |
| <b>Exercise and rehabilitation interventions in different settings and populations</b>                    |                   |                                                                             |            |              |                 |        |        |                |              |                                                                               |     |
| <b>Patients with Parkinson’s disease (PwPD)</b>                                                           |                   |                                                                             |            |              |                 |        |        |                |              |                                                                               |     |
| Mollinedo Cardalda (2018)                                                                                 | IG (mat pilates)  | baseline vs. end of intervention                                            | +++        | +            | +               | +      | +      | +              | N/A          |                                                                               |     |
|                                                                                                           |                   | end of intervention vs. 4w after                                            | +          | -*           | -               | +      | -*     | +              |              |                                                                               |     |
|                                                                                                           | CG (calisthenics) | baseline vs. end of intervention                                            | -          | -            | -               | +      | -      | -              |              |                                                                               |     |
|                                                                                                           |                   | end of intervention vs. 4w after                                            | -          | -            | -               | +      | -      | -*             |              |                                                                               |     |

|                                                                           | Groups                       | Pre-post conditions/timepoints                                                | iTUG total | Sit to stand | Walk 1         | Turn 1 | Walk 2 | Turn 2           | Stand to sit | Notes                                                                                           |
|---------------------------------------------------------------------------|------------------------------|-------------------------------------------------------------------------------|------------|--------------|----------------|--------|--------|------------------|--------------|-------------------------------------------------------------------------------------------------|
| <b>Participants recruited in outpatient settings</b>                      |                              |                                                                               |            |              |                |        |        |                  |              |                                                                                                 |
| Smith (2021)                                                              | IG („Better Bones“)          | baseline vs. after intervention                                               | +**        | +**          | +              | +*     | N/A    |                  | +            |                                                                                                 |
|                                                                           |                              |                                                                               |            |              | total walk: +* |        |        |                  |              |                                                                                                 |
| Celletti (2020)                                                           | IG                           | baseline vs. after back school treatment                                      | +**        | +*           | N/A            |        |        |                  | +            | measurement timepoint not specified                                                             |
| Doheny (2013)                                                             | IG (step exercise)           | baseline (T1) vs. 4w after T1 (T2)                                            | +          | +            | N/A            |        |        | +*               | o            | two baseline measures: T1 = first baseline, T2 = 4w after baseline before start of intervention |
|                                                                           |                              |                                                                               |            |              | walk to sit: + |        |        |                  |              |                                                                                                 |
|                                                                           |                              | baseline (T1) vs. 4w after end of interv. (T3)                                | +          | +            | N/A            |        |        | +*               | -            |                                                                                                 |
|                                                                           |                              |                                                                               |            |              | walk to sit: + |        |        |                  |              |                                                                                                 |
| Williams (2021)                                                           | IG (Tai Chi)                 | baseline vs. 6 months after baseline                                          | N/A        | +            | +              | -      | +      | N/A              | N/A          |                                                                                                 |
|                                                                           | CG (usual care)              |                                                                               |            | +            | -              | -      | -      |                  |              |                                                                                                 |
| <b>Participants recruited in inpatient and institutionalized settings</b> |                              |                                                                               |            |              |                |        |        |                  |              |                                                                                                 |
| Caronni (2019)                                                            | IG                           | baseline vs. end of physiotherapy/occupational therapy rehabilitation program | +**        | +**          | +**            | +**    | +**    | turn and sit: +* |              |                                                                                                 |
| Cancela Carral (2017)                                                     | IG <sub>A</sub> (aerobic)    | baseline vs. 1w after end of intervention                                     |            | +            | +              | +*     | +      | +*               | N/A          | +                                                                                               |
|                                                                           | IG <sub>B</sub> (resistance) |                                                                               |            | +            | +*             | +*     | +      | +*               |              | +                                                                                               |
|                                                                           | IG <sub>C</sub> (mobility)   |                                                                               |            | -            | -*             | -      | -*     | +                |              | -*                                                                                              |
| Cancela Carral (2019)                                                     | IG (strength training)       | baseline vs. last week of intervention                                        |            | +            | -              | +      | -*     | +                | N/A          | -                                                                                               |
|                                                                           | CG                           |                                                                               |            | -*           | -*             | -      | -      | +                |              | -*                                                                                              |
| <b>Assistive devices</b>                                                  |                              |                                                                               |            |              |                |        |        |                  |              |                                                                                                 |

|                   | Groups            | Pre-post conditions/timepoints | iTUG total | Sit to stand | Walk 1 | Turn 1 | Walk 2 | Turn 2 | Stand to sit | Notes |
|-------------------|-------------------|--------------------------------|------------|--------------|--------|--------|--------|--------|--------------|-------|
| Toosizadeh (2020) | moderate function | no calf vibration vs. 30Hz     | (-)        | (-)          | (+)    | -      | (+)    | -      |              |       |
|                   |                   | no calf vibration vs. 40Hz     | (-)        | (-)          | (+)    | -      | (+)    | -      |              |       |
|                   | low function      | no calf vibration vs. 30Hz     | (+)        | (-)          | (-)    | +      | (-)    | +*     |              |       |
|                   |                   | no calf vibration vs. 40Hz     | (+)        | (-)          | (-)    | +*     | (-)    | +      |              |       |

**Notes:** articles that do not provide data on iTUG segments are not displayed in this table, + = improvement, - = worsening, o = no difference, \*p < .05, \*\* p < .01 compared to baseline, CG = control group, IG = intervention group, N/A = not available, () = significance not reported, TKR = total knee replacement, VPS = ventriculoperitoneal shunt surgery
